# Supplementary material
Source: PubMed Central journal article supplement (PMC9628766)
Supplement: NIHMS1845159-supplement-1.pdf [file NIHMS1845159-supplement-1.pdf]

## Supplemental Information

### Zika Virus Targets Glioblastoma Stem

### Cells through a SOX2-Integrin $\alpha_v\beta_5$ Axis

Zhe Zhu, Pinar Mesci, Jean A. Bernatchez, Ryan C. Gimple, Xiuxing Wang, Simon T. Schafer, Hiromi I. Wettersten, Sungjun Beck, Alex E. Clark, Qiulian Wu, Briana C. Prager, Leo J.Y. Kim, Rekha Dhanwani, Sonia Sharma, Alexandra Garancher, Sara M. Weis, Stephen C. Mack, Priscilla D. Negraes, Cleber A. Trujillo, Luiz O. Penalva, Jing Feng, Zhou Lan, Rong Zhang, Alex W. Wessel, Sanjay Dhawan, Michael S. Diamond, Clark C. Chen, Robert J. Wechsler-Reya, Fred H. Gage, Hongzhen Hu, Jair L. Siqueira-Neto, Alysson R. Muotri, David A. Cheresch, and Jeremy N. Rich

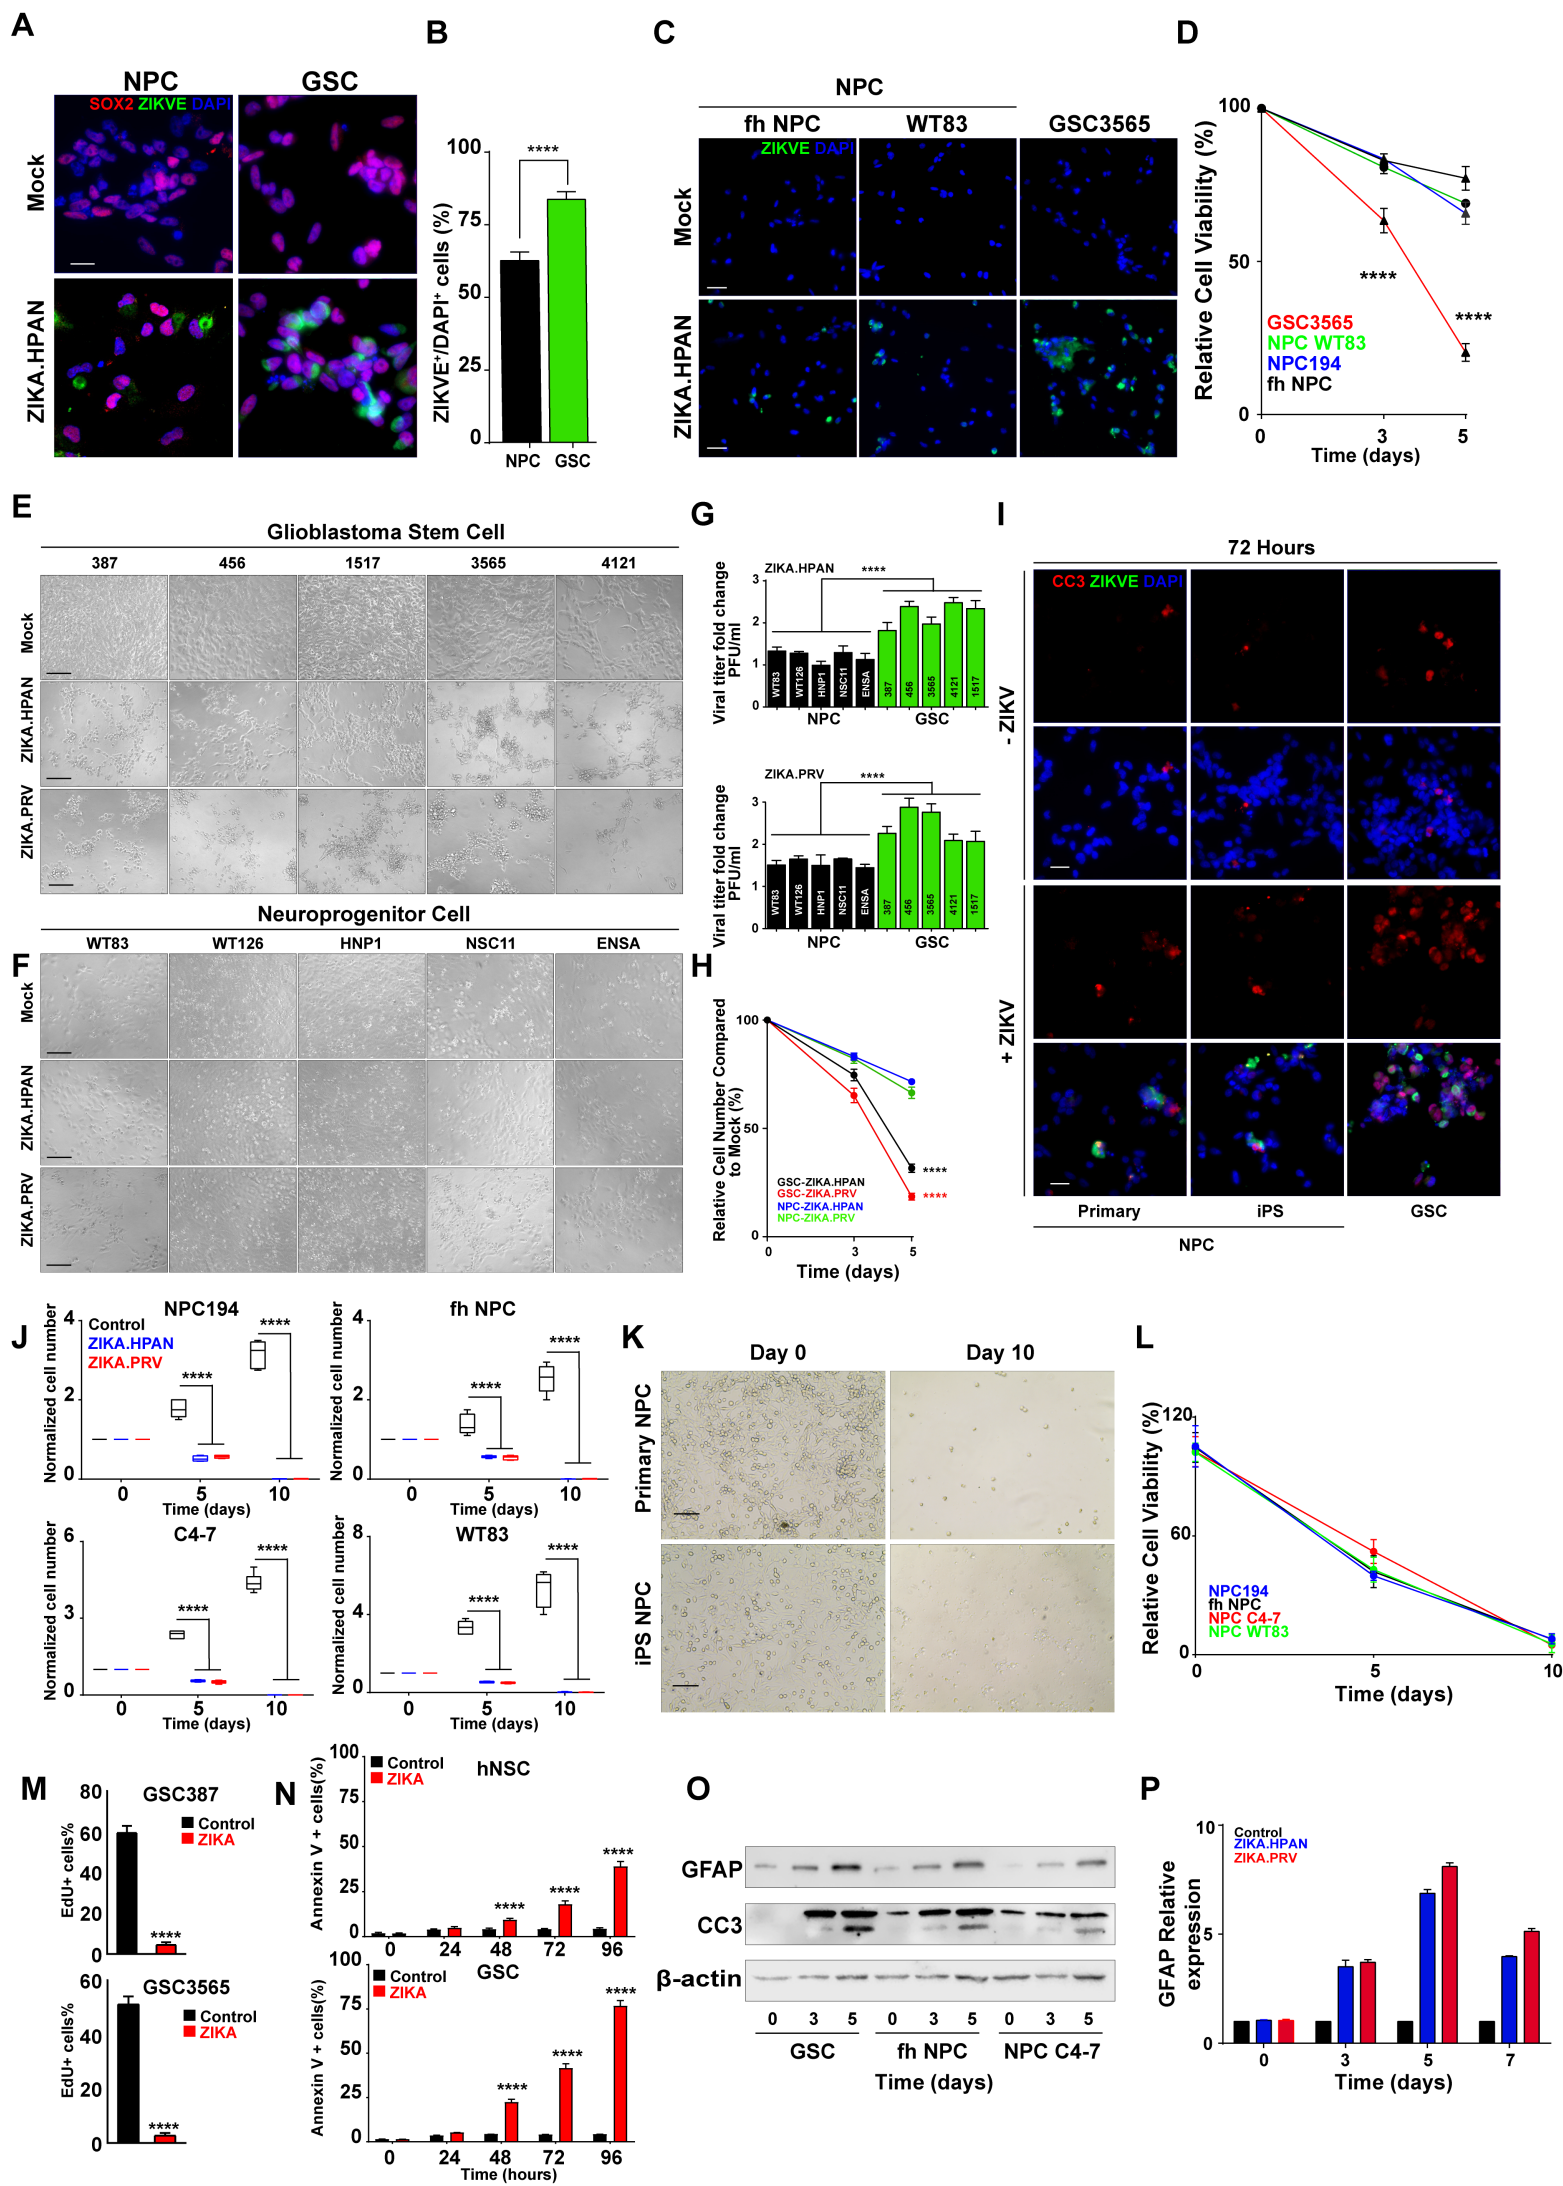

**1 SUPPLEMENTAL FIGURES & LEGENDS****2 Supplemental Figure 1. refers to Figure 1. Comparative infection efficiency of ZIKV on GBM  
3 stem cells (GSCs) and neural precursor cells (NPCs).**

4 **A.** Primary NPCs and patient-derived GSCs underwent analysis for expression of the SOX2  
5 neural progenitor marker (red) and the ZIKV envelope protein (ZIKV-E, green) under mock  
6 conditions or after ZIKV infection. Cell nuclei were imaged with DAPI. Scale bars, 20  $\mu$ m.

7 **B.** The results of experiments in (A) were quantified. \*\*\*\*,  $p < 0.0001$  two tailed Student's  
8 t-test.

9 **C.** 48 hours post ZIKV infection, patient-derived GSCs (GSC3565) and NPCs (primary and  
10 iPSC-derived) underwent immunostaining for ZIKV (green) with counterstaining by DAPI. GSCs  
11 displayed a greater fraction of ZIKV<sup>+</sup> cells than NPCs, with similar infection efficiency of primary  
12 and iPSC-derived NPCs. Scale bars, 40  $\mu$ m.

13 **D.** The effects of ZIKV infection on cell viability was measured in GSCs and NPCs using the  
14 Cell Titer-Glo assay, revealing a greater loss of cell viability upon ZIKV infection in GSCs than either  
15 primary or iPSC-derived NPCs.

16 **E.** Representative brightfield images of GSCs (387, 456, 1517, 3565, and 4121) observed 5  
17 days after infection with ZIKA.HPAN (MOI: 5 FFU/cell). Scale bars, 100  $\mu$ m.

18 **F.** Representative brightfield images of NPCs (WT83, WT126, HNP1, NSC11, ENSA) observed  
19 5 days after infection with ZIKA.HPAN (MOI: 5 FFU/cell). Scale bars, 100  $\mu$ m.

20 **G.** Plaque assays were used to determine viral titers of NPCs and GSCs four days post  
21 infection with either ZIKA.HPAN (top) or ZIKA.PRV (bottom) at MOI of 0.1 FFU/cell. Values  
22 represent mean  $\pm$  SEM and were normalized to day 0 levels as fold change. \*\*\*\*,  $p < 0.0001$  by  
23 one-way ANOVA.

24 **H.** GSCs (GSC3565) and NPCs (NPC C4-7) were treated with mock conditions or infected with  
25 ZIKA.PRV or ZIKA.HPAN (MOI: 5 FFU/cell) with viability assayed over 5 days by CellTiter-Glo.  
26 Values represent mean  $\pm$  SEM. \*\*\*\*,  $p < 0.0001$  by one-way ANOVA.

27 **I.** Cell death of GSCs and NPCs upon ZIKV infection was measured by Cleaved Caspase-3  
28 (CC3) staining, showing more apoptotic cells in GSCs than NPCs. Primary and iPSC-derived NPCs  
29 had similar rates of cell death upon ZIKV infection. Scale bars, 40  $\mu$ m.

30 **J.** The effects of ZIKV on primary and iPSC-derived NPCs was measured over a time course.  
31 None of the NPCs displayed augmentation of proliferation, which would be expected with  
32 oncogenic transformation. \*\*\*\*,  $p < 0.0001$  by one-way ANOVA.

33 **K.** Visualization of ZIKV infection on primary and iPSC-derived NPCs was assessed over a  
34 time course using brightfield images. No morphologic changes consistent with oncogenic  
35 transformation were detected over a time course. Scale bars, 40  $\mu\text{m}$ .

36 **L.** Results in (K) were quantified.

37 **M.** GSC387 and GSC3565 were treated with Zika virus at MOI of 5 FFU/cell, 72 hours after  
38 infection, EdU labeling assay was used to label proliferating cells. Mock treated GSCs were used  
39 as control. \*\*\*\*  $p < 0.0001$  by two tailed Student's t-test.

40 **N.** hNSCs and GSCs were infected with Zika at MOI of 5 FFU/cell, Annexin V labeling were  
41 used over a time course from 0 hour to 96 hours and quantified. Uninfected (control) and ZIKV-  
42 infected (Zika) cells were compared at each timepoint. Values represent mean  $\pm$  SEM. \*\*\*\*,  $p <$   
43  $0.0001$  by one-way ANOVA.

44 **O.** Effects of ZIKV on cellular differentiation and apoptosis were measured by  
45 immunoblotting for GFAP and Cleaved Caspase-3 (CC3), respectively, in GSCs, primary NPCs and  
46 iPSC-derived NPCs over a time course.

47 **P.** The effects of ZIKV infection on cellular differentiation was measured by qPCR of GFAP  
48 over one week time course.

49

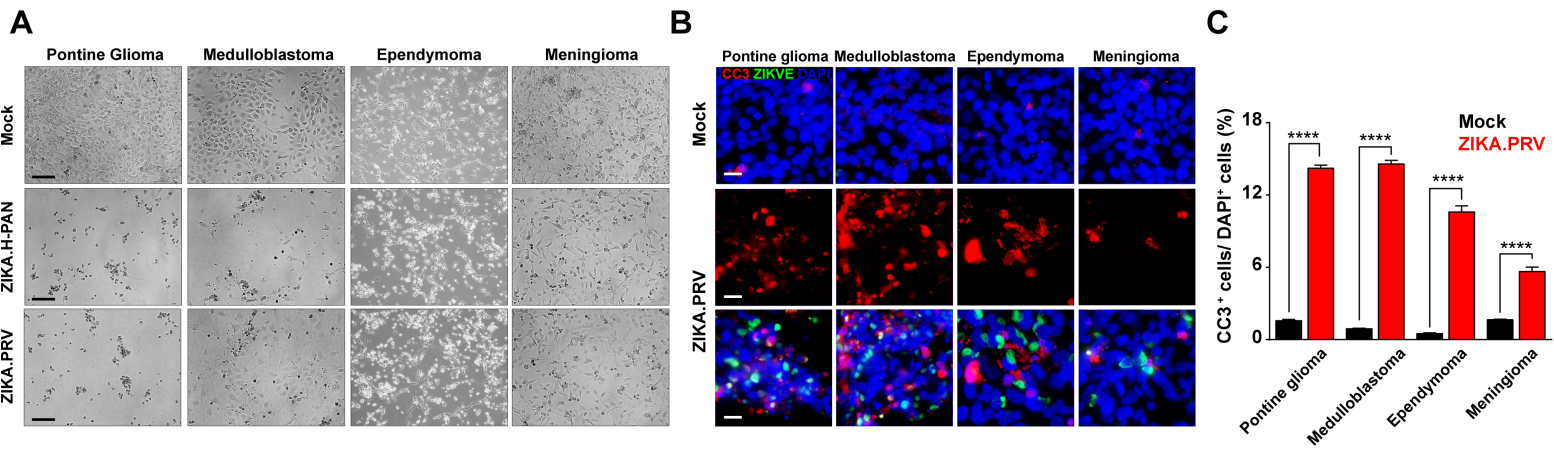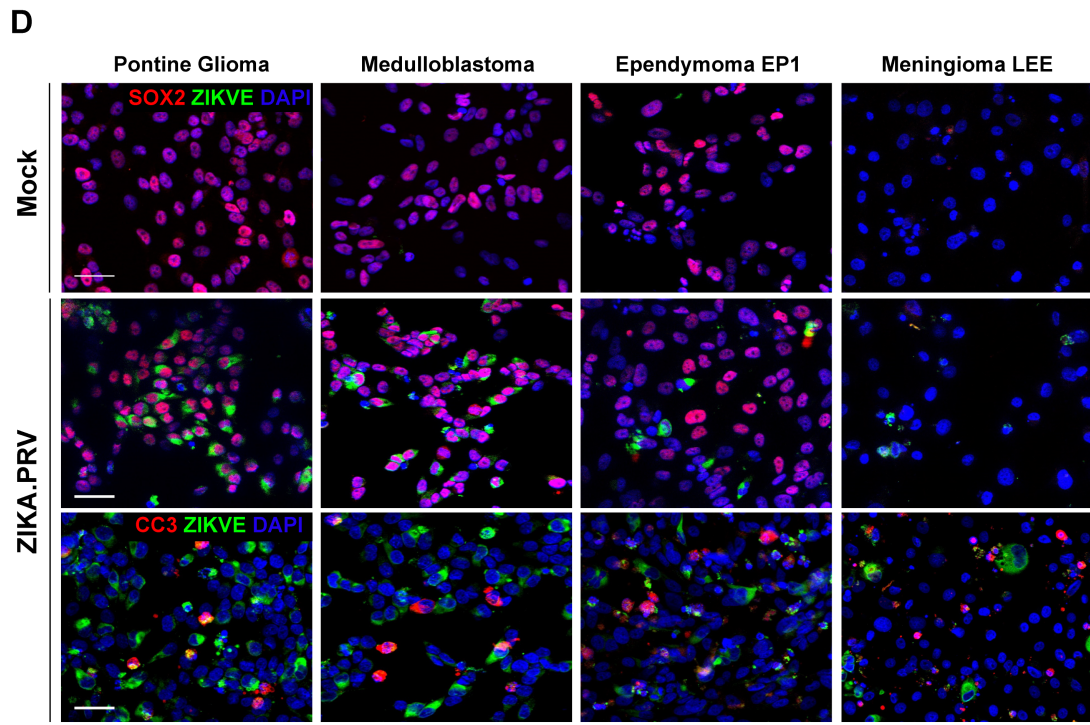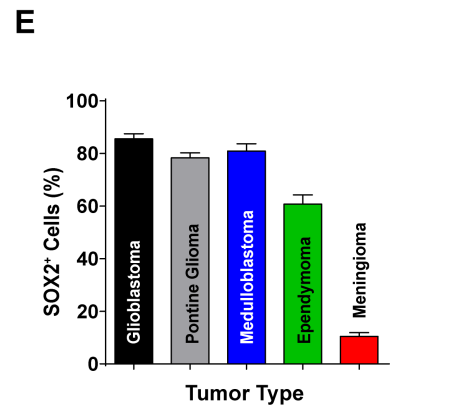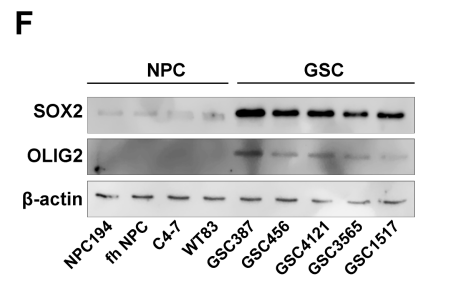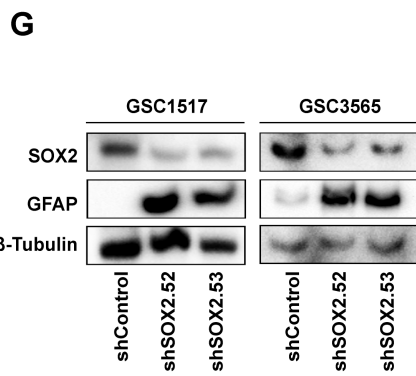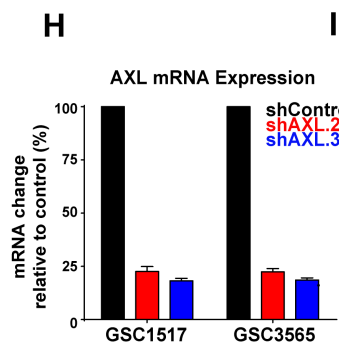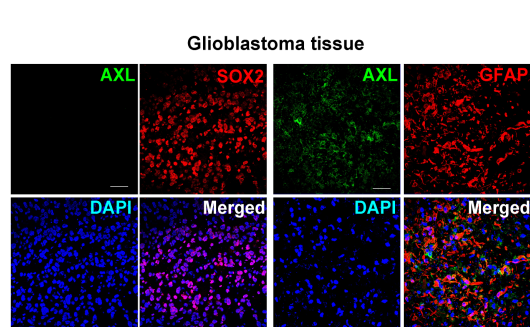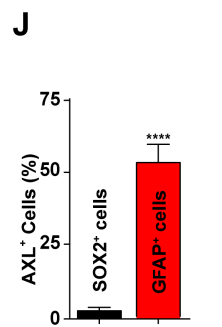

50 **Supplemental Figure S2, refers to Figure 2. SOX2 expression in NPCs, GSCs and different brain**  
51 **tumors, which mediates infection of GSCs through integrin  $\alpha_v\beta_5$ .**

52 **A.** Representative brightfield images of patient-derived cultures from pontine glioma,  
53 medulloblastoma, ependymoma and meningioma 5 days after mock infection or infection with  
54 one of two strains of Zika virus. MOI: 5 FFU/cell. Scale bars, 100  $\mu\text{m}$ .

55 **B.** The baseline apoptotic index of cells derived from several brain tumor types was measured  
56 under mock conditions for apoptotic index (Cleaved Caspase-3, CC3, red). Total cell numbers  
57 were quantified through stained with DAPI. Scale bars, 20  $\mu\text{m}$ .

58 **C.** Quantification of apoptotic cells upon ZIKV infection compared to mock in a spectrum of cells  
59 derived from different brain tumors. GBM and NPCs data were previously included. \*\*\*\*,  $p <$   
60 0.0001 by two tailed Student's t-test.

61 **D.** Representative confocal images of brain tumor cultures from (A) were immunostained 48  
62 hours post ZIKA.PRV infection (MOI: 5 FFU/cell) for ZIKV envelope protein (ZIKVE, green), SOX2  
63 or Cleaved Caspase-3 (red), and DAPI (blue). Scale bars, 100  $\mu\text{m}$ .

64 **E.** Quantification of SOX2<sup>+</sup> cells in different brain tumor models used in (A) with two independent  
65 repeats.

66 **F.** Basal levels of precursor markers, SOX2 and OLIG2, were measured in primary NPCs, iPSC-  
67 derived NPCs, and patient-derived GSCs by immunoblotting.  $\beta$ -actin served as a loading control.  
68 GSCs expressed higher levels of SOX2 and OLIG2, whereas primary and iPSC-derived NPCs  
69 expressed similar levels.

70 **G.** Two patient-derived GSCs (GSC3565 and GSC1517) were transduced with either a control  
71 shRNA (shCONT) or one of two shRNAs targeting SOX2 (shSOX2.52 or shSOX2.53). 72 hours later,  
72 whole cell lysates were generated and resolved by SDS-PAGE with SOX2 and GFAP protein levels  
73 measured by immunoblotting. Tubulin was used as a loading control.

74 **H.** Two patient-derived GSCs (GSC3565 and GSC1517) were transduced with either a control  
75 shRNA (shCONT) or one of two shRNAs targeting AXL (shAXL.2, or shAXL.3). AXL levels were  
76 measured by qPCR and normalized to the values from shCONT.

77 **I.** Representative images of primary human GBM surgical biopsy specimens stained for AXL  
78 (green), SOX2 or GFAP (red) and DAPI (blue). Scale bars, 100  $\mu\text{m}$ . (Right)

79 J. Quantification of AXL<sup>+</sup> cells in SOX2<sup>+</sup> or GFAP<sup>+</sup> cells in primary human GBM surgical biopsy  
80 specimens. Values represent mean  $\pm$  SEM. \*\*\*\*,  $p < 0.0001$  by two tailed Student's t-test.

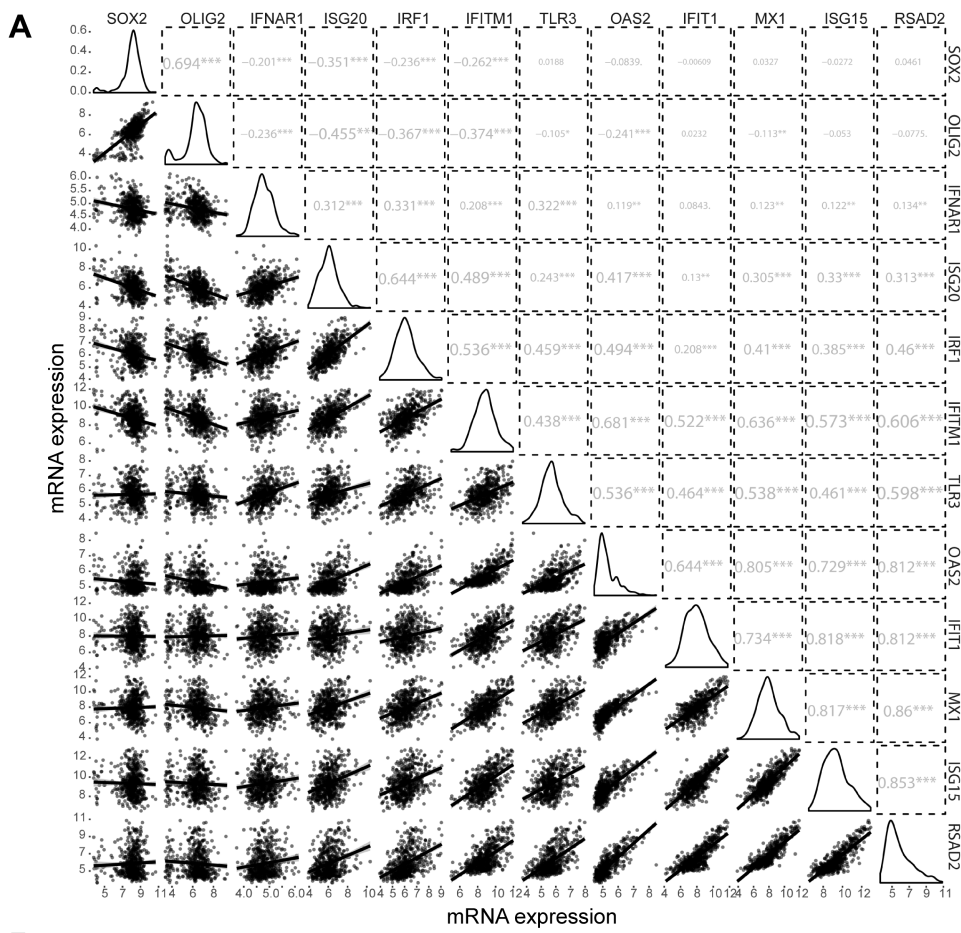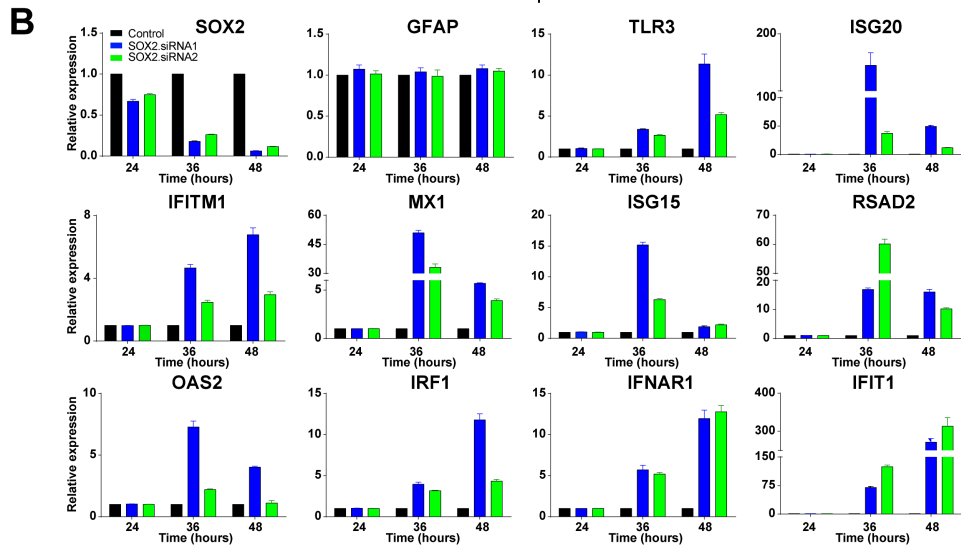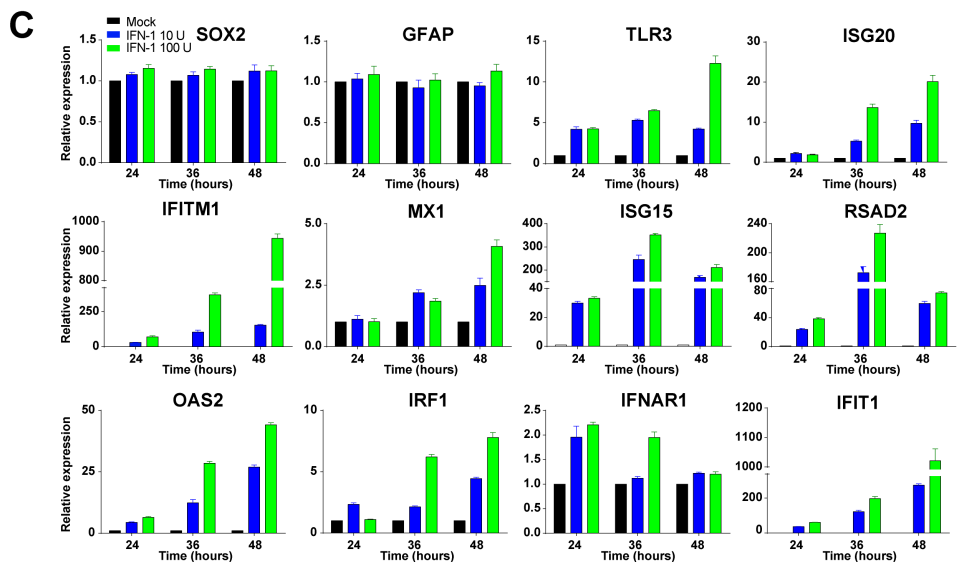



---

81 **Supplemental Figure 3, refers to Figure 3. Targeting SOX2 induces ISG expression in GSCs.**

82 **A.** SOX2 expression inversely correlates with ISG expression in GBM. The GBM TCGA database  
83 was interrogated for correlation between mRNA expression levels of SOX2 and OLIG2 with  
84 ISGs. R-values are presented for each gene-gene correlation.

85 **B.** Gene expression time course in GSCs upon SOX2 targeting. GSCs without ZIKV infection were  
86 transduced with a non-targeting control siRNA or one of two, non-overlapping siRNAs. mRNA  
87 expression of SOX2, GFAP and several ISGs following knockdown of SOX2 were monitored  
88 over 24-48 hours. All experiments were performed in the absence of ZIKV infection.

89 **C.** mRNA expression level of SOX2, GFAP, and several ISGs in GSC3565 following treatment with  
90 interferon at two concentrations over a time course. Each experiment was performed in 3  
91 technical replicates and two biological repeats.

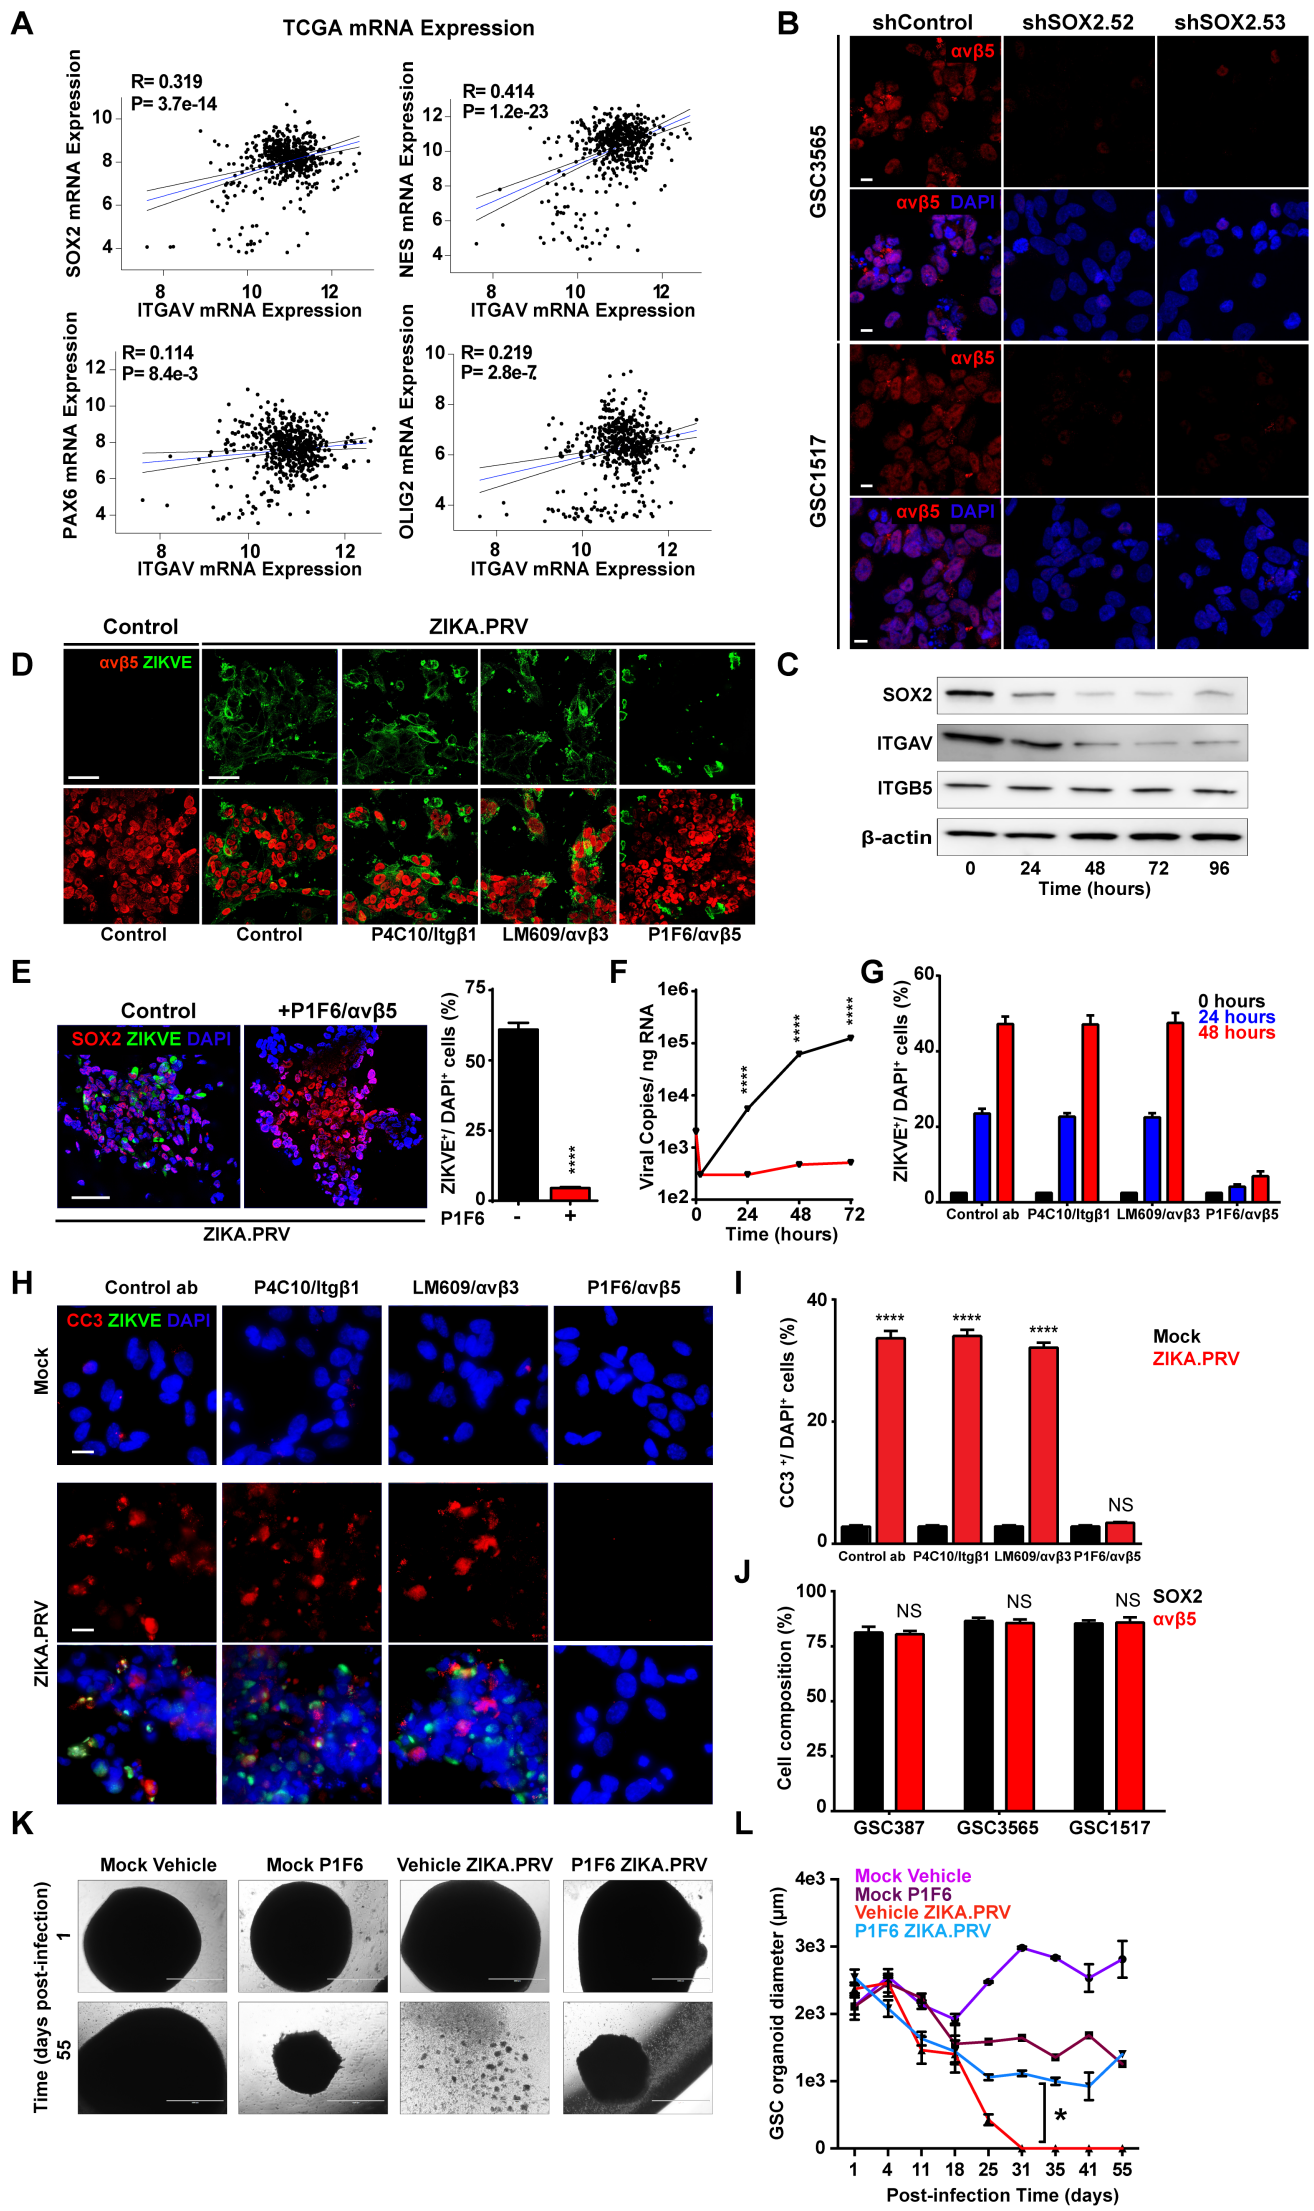

92 **Supplemental Figure 4, refers to Figure 4. Pharmacological Blocking of integrin  $\alpha_v\beta_5$  attenuates**  
93 **ZIKV infection.**

94 **A.** Plots showing correlation of mRNA levels between *ITGAV* with *SOX2*, *NES*, *PAX6* and *OLIG2*  
95 in GBMs derived from the HG-U133A microarray dataset in The Cancer Genome Atlas (TCGA)  
96 GBM dataset.

97 **B.** Patient-derived GSCs were transduced with a non-targeting control shRNA (shControl) or one  
98 of two non-overlapping shRNAs targeting *SOX2* (labeled shSOX2.52 and shSOX2.53).  
99 Transduced GSCs underwent immunofluorescent staining 72 hours for the integrin  $\alpha_v\beta_5$   
100 heterodimer (red) and DAPI (blue). Scale bars, 10  $\mu\text{m}$ .

101 **C.** Immunoblots were performed for *SOX2*, integrin  $\alpha_v$ , and integrin  $\beta_5$  over a 96 hours time  
102 course.  $\beta$ -actin was used as a loading control.

103 **D.** GSC3565 were cultured either under mock condition alone or with one of three blocking  
104 antibodies against integrins (Itg $\beta_1$ , P4C10;  $\alpha_v\beta_3$ , LM609;  $\alpha_v\beta_5$ , P1F6 at 50  $\mu\text{g}/\text{ml}$  for 2 hours  
105 at 4°C) then infected with ZIKA.PR.V (MOI: 5 FFU/cell). Representative confocal  
106 immunofluorescent images for integrin  $\alpha_v\beta_5$  (red) or ZIKV envelope protein (ZIKVE, green)  
107 were shown. Scale bars, 100  $\mu\text{m}$ .

108 **E.** GSC3565 were cultured either under mock condition or with a neutralizing antibody against  
109  $\alpha_v\beta_5$  (P1F6 at 50  $\mu\text{g}/\text{ml}$  for 2 hours at 4°C) then infected with ZIKA.PR.V (MOI: 5 FFU/cell).  
110 (Left) Representative confocal immunofluorescent images after 48 hours infection for ZIKV  
111 envelope protein (ZIKVE, green), *SOX2* (red) and DAPI (blue) were shown. (Right) ZIKV<sup>+</sup> cells  
112 in GSCs subjected to mock conditions or with neutralizing antibodies against integrin  $\alpha_v\beta_5$   
113 were shown. Values represent mean  $\pm$  SEM. \*\*\*\*,  $p < 0.0001$  by two tailed Student's t-test.  
114 Scale bars, 100  $\mu\text{m}$ .

115 **F.** GSC3565 were cultured either under mock condition or with a neutralizing antibody against  
116 integrin  $\alpha_v\beta_5$  (P1F6 at 50  $\mu\text{g}/\text{ml}$  for 2 hours at 4°C) then infected with ZIKA.PR.V (MOI: 0.1  
117 FFU/cell). Kinetics of viral RNA copy number was measured by qRT-PCR over a 72 hours time  
118 course. Values represent mean  $\pm$  SEM. \*\*\*\*,  $p < 0.0001$  by one-way ANOVA.

119 **G.** Quantification of ZIKV<sup>+</sup> cells in GSC3565 using different integrin antibody treatments  
120 according to different time points.

- 121 **H.** Patient-derived GSCs were cultured under mock (upper panel) or ZIKV (lower panel)  
122 conditions with IgG control or blocking antibodies against several integrins (pan- $\beta_1$ ,  $\alpha_v\beta_3$ , or  
123  $\alpha_v\beta_5$ ). GSCs were immunostained for ZIKVE (green), CC3 (red) and DAPI (blue). Scale bars, 20  
124  $\mu\text{m}$ .
- 125 **I.** Quantification of CC3<sup>+</sup> cells upon ZIKV infection compared to mock control, after incubation  
126 with antibodies targeting several integrins. \*\*\*\*,  $p < 0.0001$ , by two tailed Student's t-test.
- 127 **J.** Quantification of  $\alpha_v\beta_5$  and SOX2 cells in total DAPI cells by GSC387, GSC3565 and GSC1517  
128 models. The percentages were similar between  $\alpha_v\beta_5^+$  and SOX2<sup>+</sup> cells (NS, no significance).
- 129 **K.** Organoids were derived from GSC3565 and subjected to treatment with mock condition, a  
130 blocking antibody against integrin  $\alpha_v\beta_5$  (P1F6 at 50  $\mu\text{g}/\text{ml}$  twice a week), ZIKA.PRV infection  
131 (MOI: 5 FFU/cell), or the combined antibody and ZIKV treatment. Brightfield images were  
132 taken over a time course until day 55. N = 5. Scale bars, 1 mm.
- 133 **L.** GSC-derived organoids from (H) were assayed for their diameter over a time course. Values  
134 represent mean  $\pm$  SEM. \*,  $p < 0.05$  by two-way ANOVA.
- 135

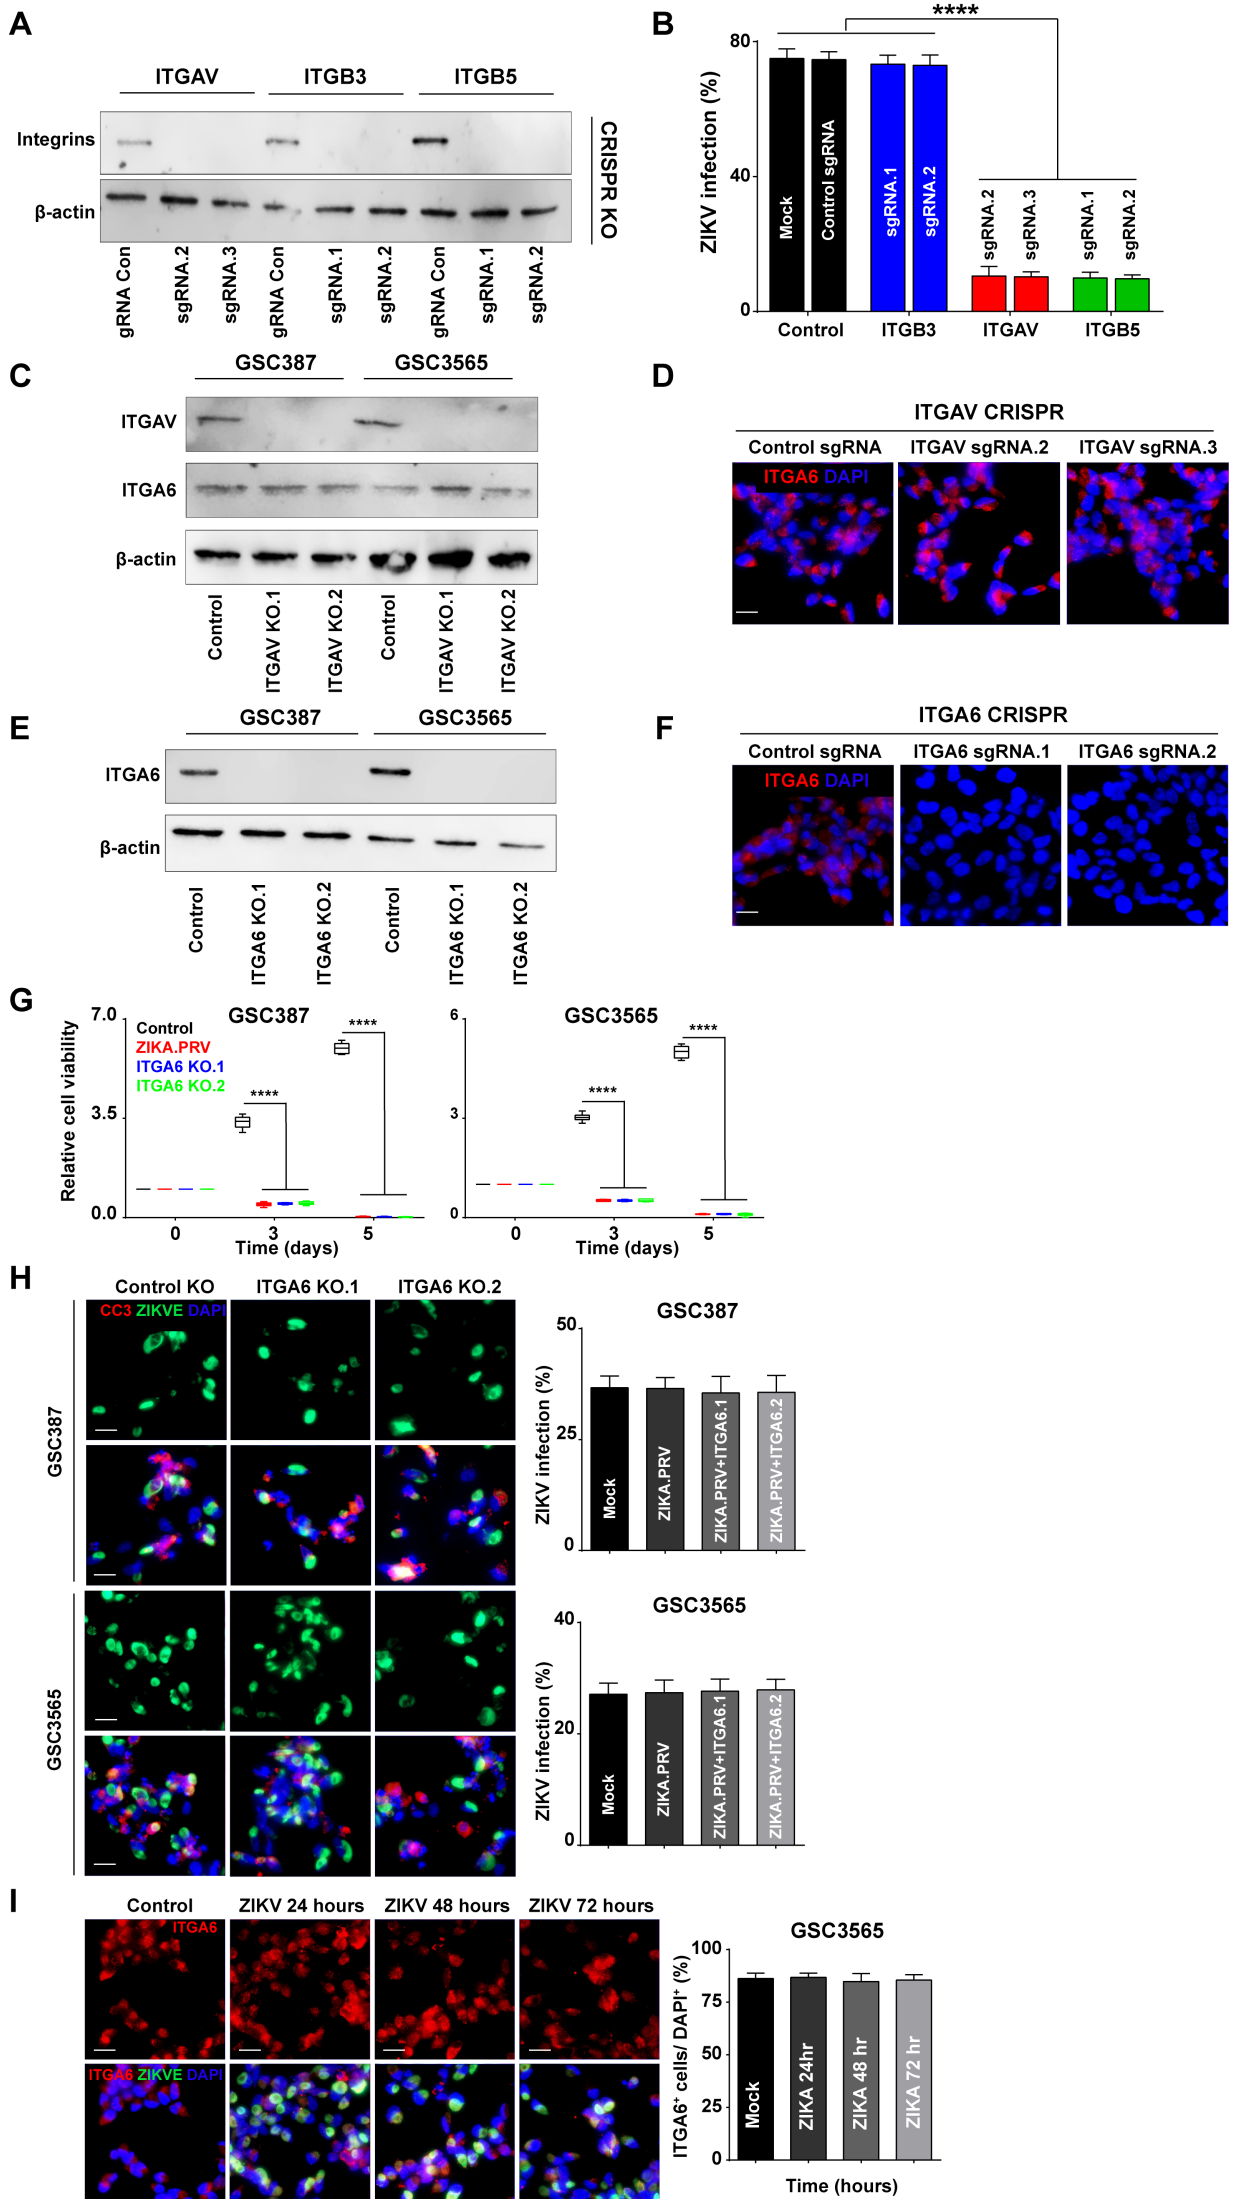

136 **Supplemental Figure 5, refers to Figure 5. CRISPR-mediated targeting of ITGAV and ITGB5**  
137 **integrins, but not ITGB3 attenuates ZIKV infection of GSCs**

138 **A.** Patient-derived GSCs were transduced with sgRNAs for a non-targeting control sequence  
139 (Control sgRNA) or one of two sgRNAs targeting selected integrins. Whole cell lysates from  
140 transduced GSCs were collected and resolved by SDS-PAGE. Immunoblotting confirmed  
141 successful knockout of integrins at the protein level.

142 **B.** GSC3565 under mock conditions or transduced with indicated sgRNAs were examined for  
143 ZIKV infection efficiency.

144 **C-F.** Patient-derived GSCs (GSC387 and GSC3565) were transduced with a non-targeting control  
145 sgRNA or one of two sgRNAs targeting either (E,F) ITGA6 or (C, D) ITGAV. A and B. ITGA6 and/or  
146 ITGAV expression was assessed by immunoblotting.  $\beta$ -actin was used as a loading control. D and  
147 F. ITGA6 expression was analyzed by immunofluorescence after targeting (F) ITGA6 or (D) ITGAV.  
148 DAPI (blue) was used as counterstain. Scale bars, 20  $\mu$ m.

149 **G.** Patient-derived GSCs were either infected with ZIKV or transduced with sgRNAs targeting  
150 ITGA6. The CellTiter-Glo assay was performed over a time course.

151 **H.** Patient-derived GSCs were transduced with either a non-targeting control sgRNA or one  
152 of two, non-overlapping sgRNAs targeting ITGA6. Left, immunostaining for ZIKVE (green), CC3  
153 (red) with DAPI (blue). Right, quantification of ZIKVE<sup>+</sup> cells in DAPI<sup>+</sup> cells.

154 **I.** Left, immunostaining for ZIKV (green), ITGA6 (red) and DAPI (blue). Right, quantification  
155 of ITGA6<sup>+</sup> cells in DAPI<sup>+</sup> cells. Scale bars, 20  $\mu$ m. Values represent mean  $\pm$  SEM. \*\*\*\*,  $p < 0.0001$   
156 by one-way ANOVA.

157

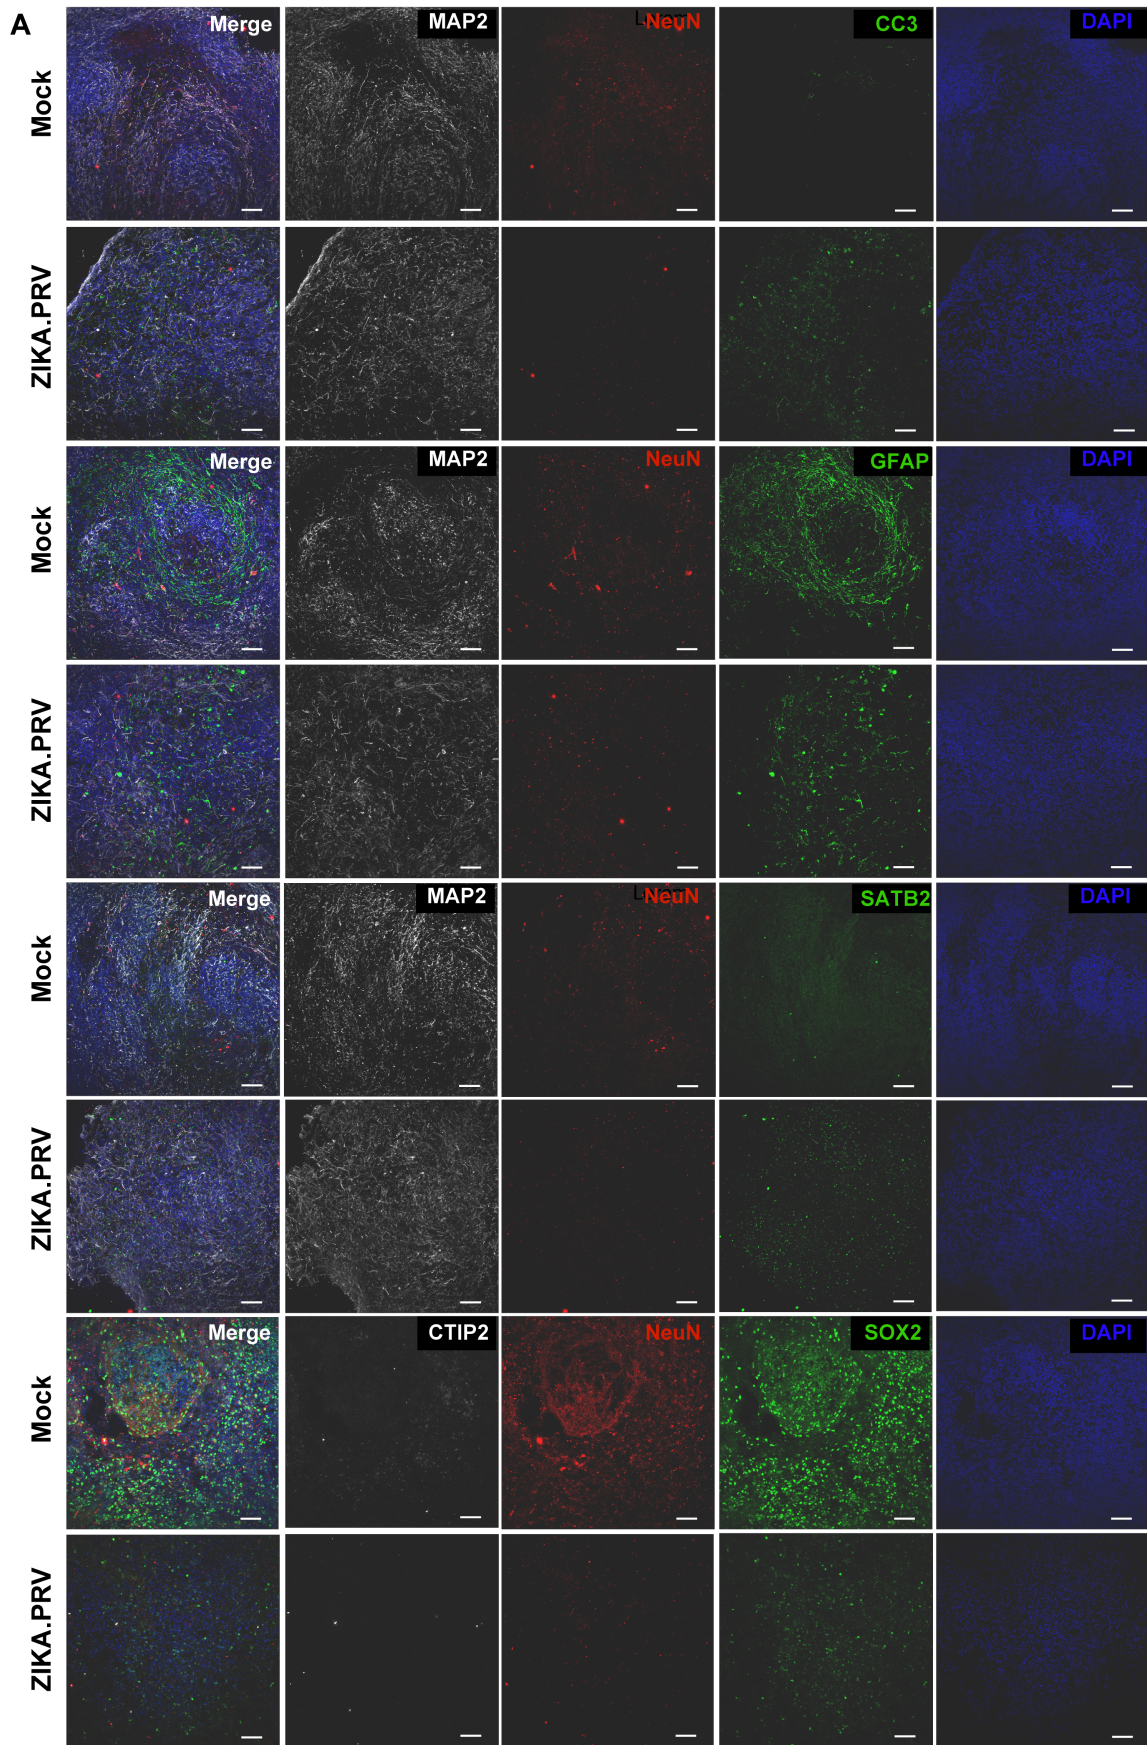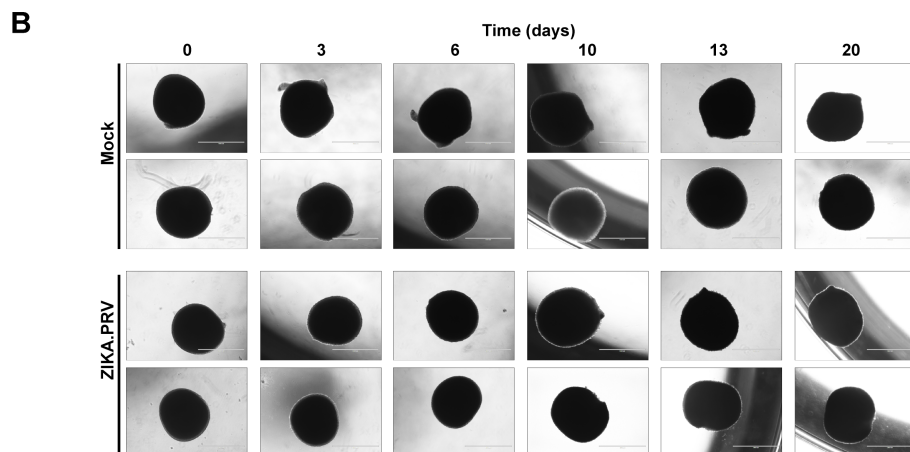

---

158 **Supplemental Figure 6, refers to Figure 6. Effects of ZIKV on normal brain cortical organoid**  
159 **cellular types and size.**

160 **A.** Representative images of mock or ZIKV-infected brain cortical organoids immunostained  
161 with MAP2, NeuN, CC3, GFAP, CTIP2, SATB2, SOX2 and DAPI. Scale bar = 100 $\mu$ m.

162 **B.** Representative brightfield images of brain cortical organoids derived from induced  
163 pluripotent stem cells that were subjected to mock conditions or infected with ZIKA.PRIV  
164 (MOI: 5 FFU/cell) over a time course until 20 days post infection. Scale bar, 1 mm.

165



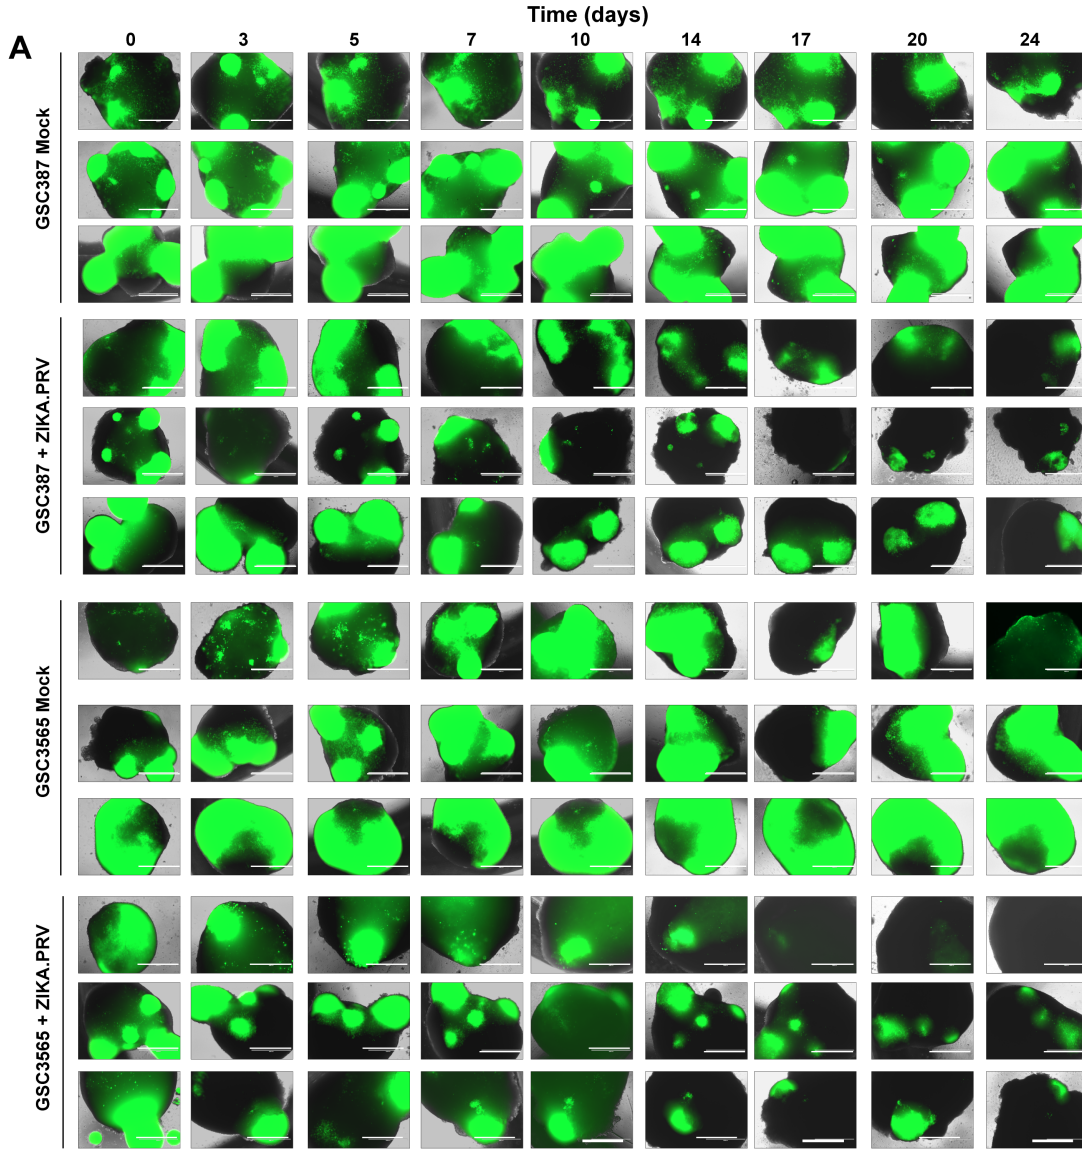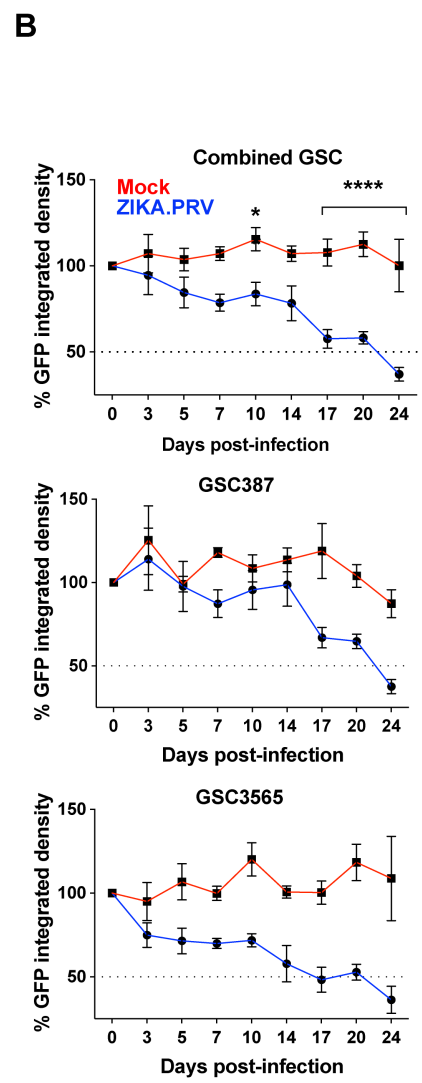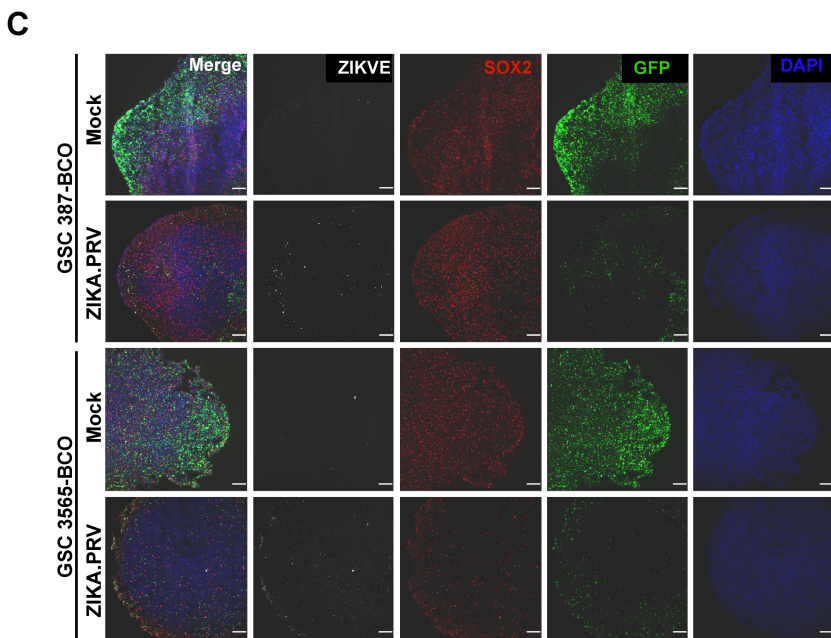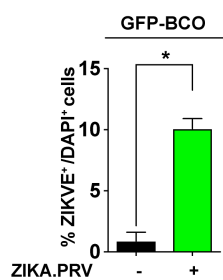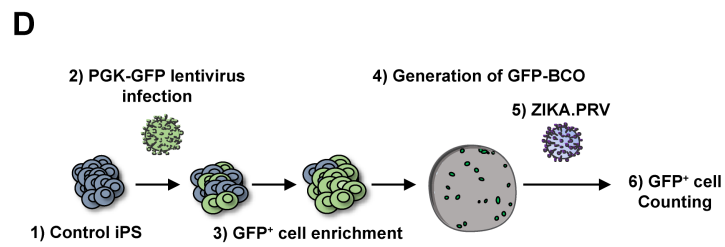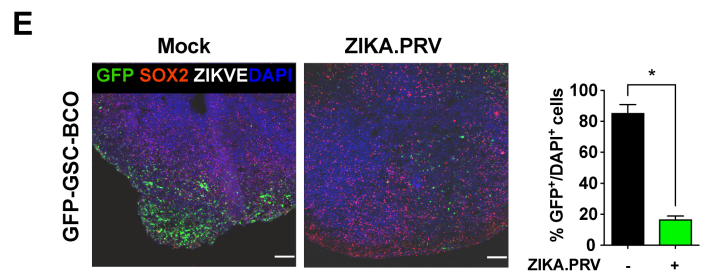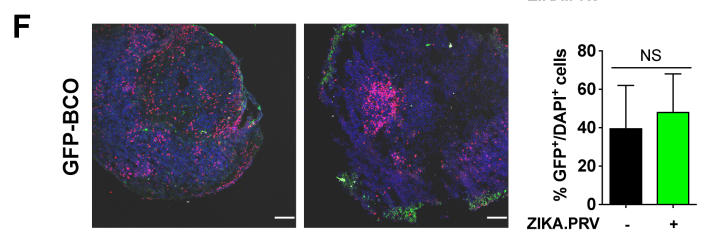

166 **Supplemental Figure 7, refers to Figure 7. ZIKV infection preferentially targets GBM in GSC-**  
167 **brain cortical organoids models**

- 168 **A.** Brain cortical organoids were derived from induced pluripotent stem cells then confronted  
169 with GFP-labeled GSCs (GSC387 or GSC3565), permitting integration. Brightfield images  
170 showing GSC-brain cortical organoids after being subjected to mock conditions or infection  
171 with ZIKA.PRIV (MOI: 5 FFU/cell) were taken over a time course until day 24. Scale bars, 1 mm.
- 172 **B.** GFP integrated density shown in A was measured using ImageJ software. Mock infection vs.  
173 ZIKA.PRIV infection. Day 10:  $p = 0.03$ ; \*,  $p < 0.05$ ; days 17, 20 and 24: \*\*\*\*,  $p < 0.0001$  by two-  
174 way ANOVA.
- 175 **C.** Representative images of GSC-brain cortical organoids with or without ZIKV immunostained  
176 with NS1, staining for ZIKV, SOX2, GFP and DAPI (GSC387 top panel, GSC3565 bottom panel).  
177 Scale bars, 50  $\mu\text{m}$ . The quantification of ZIKV<sup>+</sup> (quantified by NS1 immunostaining) within all  
178 cells and ZIKV<sup>+</sup> cells within the GFP<sup>+</sup> cells in GSC-brain cortical organoid (BCO) mock vs GSC-  
179 BCO ZIKV respectively. Significance was assessed by two tailed Student's t-test, experiments  
180 were performed in two batches with 12 organoids per group, per batch (\* $p < 0.05$ ).
- 181 **D.** Schematic of GFP-brain cortical organoid (BCO) generation. Control iPS were firstly infected  
182 with a lentivirus containing the PGK-GFP vector, then the GFP<sup>+</sup> cells were enriched using FACs  
183 sorting to generate brain cortical organoids by sorted GFP-iPS. These organoids were then  
184 infected with ZIKA.PRIV (MOI: 5 FFU/cell) and the GFP<sup>+</sup> cells were counted.
- 185 **E.** GFP-BCO and GFP-GSC-BCO were immunostained with SOX2, ZIKVE and DAPI antibodies with  
186 or without ZIKV. Quantification of GFP<sup>+</sup> cells in GFP-brain cortical organoid (BCO) with or  
187 without ZIKV infection respectively. Scale bars, 100  $\mu\text{m}$ . Significance was assessed by two  
188 tailed Student's t-test, experiments were performed in two batches with 12 organoids per  
189 group for each GSCs cell line (GSC387 and GSC3565), per batch (\* $p < 0.05$ ; NS, no significance).  
190 Experiments were performed in two batches with 12 organoids per group, per batch.

191

192

193

194

195

196 Table S1. All Cell lines used in the manuscript.

197

| Glioblastoma Stem Cell Model or Tissue | Patient Age (Years)                      | Patient Sex | Tumor Grade                                |
|----------------------------------------|------------------------------------------|-------------|--------------------------------------------|
| GSC387                                 | 76                                       | Female      | Glioblastoma (Grade IV)                    |
| GSC3565                                | 32                                       | Male        | Glioblastoma (Grade IV)                    |
| GSC23                                  | 63                                       | Male        | Recurrent Glioblastoma (Grade IV)          |
| MGG8                                   | Restricted by Institutional Requirements | Female      | Glioblastoma (Grade IV)                    |
| GSC1517                                | 54                                       | Female      | Glioblastoma (Grade IV)                    |
| 3752                                   | 5                                        | Female      | Pontine Glioma(Milde <i>et al.</i> , 2011) |
| 007                                    | 6                                        | unknown     | Pontine Glioma                             |
| CH-157MN                               | 41                                       | Female      | Meningioma                                 |
| IOMM-Lee                               | 61                                       | Male        | Meningioma                                 |
| DAOY                                   | 4                                        | Male        | Medulloblastoma                            |
| D283                                   | 6                                        | Male        | Medulloblastoma                            |
| HDMB03                                 | 3                                        | Male        | Medulloblastoma                            |
| D341                                   | 3.5                                      | Male        | Medulloblastoma                            |

198

199

200

Table S2. Primers and Oligos for PCR and shRNA assay.

| Gene Name | Forward Primer                | Reverse Primer                |
|-----------|-------------------------------|-------------------------------|
| SOX2      | 5'-GCCGAGTGGAACTTTTGTGC-3'    | 5'-GGCAGCGTGTACTTATCCTTCT-3'  |
| OLIG2     | 5'-CCAGAGCCCGATGACCTTTT-3'    | 5'-CACTGCCTCCTAGCTTGCC-3'     |
| GFAP      | 5'-CTGCGGCTCGATCAACTCA-3'     | 5'-TCCAGCGACTCAATCTTCTC-3'    |
| ITGAV     | 5'-ATCTGTGAGGTCGAAACAGGA-3'   | 5'-TGGAGCATACTCAACAGTCTTTG-3' |
| ITGB1     | 5'-CCTACTTCTGCACGATGTGATG-3'  | 5'-CCTTTGCTACGGTTGGTTACATT-3' |
| ITGB3     | 5'-GTGACCTGAAGGAGAATCTGC-3'   | 5'-CCGGAGTGCAATCCTCTGG-3'     |
| ITGB5     | 5'-TCTCGGTGTGATCTGAGGG-3'     | 5'-TGGCGAACCTGTAGCTGGA-3'     |
| ITGB6     | 5'-TCCATCTGGAGTTGGCGAAAG-3'   | 5'-TCTGTCTGCCTACACTGAGAG-3'   |
| ITGB8     | 5'-ACCAGGAGAAGTGTCTATCCAG-3'  | 5'-CCAAGACGAAAGTCACGGGA-3'    |
| TLR3      | 5'-TTGCCTTGTATCTACTTTTGGGG-3' | 5'-TCAACTGTATGTTTGTGGGT-3'    |
| ISG20     | 5'-CTCGTTGCAGCCTCGTGAA-3'     | 5'-CGGGTTCTGTAATCGGTGATCTC-3' |
| IFITM1    | 5'-CCAAGTCCACCGTGATTAAC-3'    | 5'-ACCAGTTCAAGAAGAGGGTGT-3'   |
| MX1       | 5'-GTTTCCGAAGTGGACATCGCA-3'   | 5'-CTGCACAGTTGTTCTCAGC-3'     |
| ISG15     | 5'-CGCAGATCACCCAGAAGATCG-3'   | 5'-TTCGTCGCATTTGTCCACCA-3'    |
| RSAD2     | 5'-TGGGTGCTTACACCTGCTG-3'     | 5'-GAAGTGATAGTTGACGCTGGTT-3'  |
| OAS2      | 5'-CTCAGAAGCTGGGTTGGTTTAT-3'  | 5'-ACCATCTCGTCGATCAGTGTC-3'   |
| IRF1      | 5'-ATGCCCATCACTCGGATGC-3'     | 5'-CCCTGCTTTGTATCGGCCTG-3'    |
| IFNAR1    | 5'-AACAGGAGCGATGAGTCTGTC-3'   | 5'-TGCGAAATGGTGAAATG AGTCA-3' |

|                                                    |                                                                    |                            |
|----------------------------------------------------|--------------------------------------------------------------------|----------------------------|
| IFIT1                                              | 5'-TTGATGACGATGAAATGCCTGA-3'                                       | 5'-CAGGTCACCAGACTCCTCAC-3' |
| ZIKV835                                            | 5'-TTGGTCATGATACTGCTGATTGC-3'                                      |                            |
| ZIKV911c                                           | 5'-CCTTCCACAAAGTCCCTATTGC-3'                                       |                            |
| ZIKV860FAM                                         | 5'-CGGCATACAGCATCAGGTGCATAG GAG-3'                                 |                            |
| <b>Gene Name and start site of shRNA targeting</b> | <b>shRNA sequence</b>                                              |                            |
| ShAXL-2                                            | 5'-CCGGCGTGGAGAACAGCGAGATTTACTCGAGTAAATCTCGCTGTTCTCCACGTTTTTTG-3'  |                            |
| ShAXL-3                                            | 5'-CCGGCCTAAGCATCTAAGTTATAAGCTCGAGCTTATAACTTAGATGCTTAGGTTTTTTG-3'  |                            |
| ShSOX2-52                                          | 5'-CCGGGAAGAAGGATAAGTACACGCTCTCGAGAGCGTGTACTTATCCTTCTTTTT-3'       |                            |
| ShSOX2-53                                          | 5'-CCGGCTGCCGAGAATCCATGTATATCTCGAGATATACATGGATTCTCGGCAGTTTTT-3'    |                            |
| ShITGB1-1                                          | 5'-CCGGGCCTTGCATTACTGCTGATATCTCGAGATATCAGCAGTAATGCAAGGCTTTTTG-3'   |                            |
| ShITGB1-2                                          | 5'-CCGGGCCCTCCAGATGACATAGAACTCGAGTTTCTATGTCATCTGGAGGGCTTTTTG-3'    |                            |
| ShITGB3-3                                          | 5'-CCGGGTCGTCAGATTCCAGTACTATCTCGAGATAGTACTGGAATCTGACGACTTTTT-3'    |                            |
| ShITGB3-2                                          | 5'-CCGGCCACGTCTACCTTCACCAATACTCGAGTATTGGTGAAGGTAGACGTGGTTTTT-3'    |                            |
| ShITGB5-1                                          | 5'-CCGGGGCTCGCAGGTCTCAACATATCTCGAGATATGTTGAGACCTGCGAGCCTTTTTG-3'   |                            |
| ShITGB5-3                                          | 5'-CCGGGGATCAGCCTGAGGATCTTAAGTCTCGAGTTAAGATCCTCAGGCTGATCCTTTTTG-3' |                            |
| ShITGB6-1                                          | 5'-CCGGGCCTCAAACATTCATGATCTCGAGATCATGGGAATGTTGGAGGCTTTTTG-3'       |                            |
| ShITGB6-2                                          | 5'-CCGGCCATTGACAAATGATGCTGAACTCGAGTTCAGCATCATTTGTCAATGGTTTTT-3'    |                            |
| ShITGB8-1                                          | 5'-CCGGGCTCAGTTGATTCAATAGAATCTCGAGATTCTATTGAATCAACTGAGCTTTTTG-3'   |                            |
| ShITGB8-2                                          | 5'-CCGGCGAGCAATGATGAAGTTCTTTCTCGAGAAAGAACTTCATCATTGCTCGTTTTT-3'    |                            |

201

202 **Table S3. CHIP-PCR primers, refers to Figure 3.**

| Target Name             | Target Region (hg19)         | Forward Primer        | Reverse Primer         |
|-------------------------|------------------------------|-----------------------|------------------------|
| Negative Control #1     | chr11:35,158,607-35,159,750  | AGGGTGAGGGCTCTGAAGAT  | GCCATCCCCCTATGCATTCA   |
| SOX2 Enhancer Primer #1 | chr2:187,477,736-187,478,211 | AGGACCACTGGAATTGCTCA  | GCAGAACCAGAGGAAAACAGG  |
| SOX2 Enhancer Primer #2 | chr2:187,477,736-187,478,211 | GGCCTGTATTCTTTGTGCTGC | AGCTCATTTCACTGGGATTGGT |

203

204

205 **Table S4. sgRNA sequences and plasmids used in the manuscript**

| Target Name   | Forward Sequence           | CRISPR Type                    |
|---------------|----------------------------|--------------------------------|
| Non-Targeting | CACCGCTCTGCTGCGGAAGGATTTCG | LentiCrisprV2 (Addgene #52961) |
| ITGAV Gene 1  | GGAATTGATAGCGTATCTGC       | LentiCrisprV2 (Addgene #52961) |

|              |                      |                                   |
|--------------|----------------------|-----------------------------------|
| ITGAV Gene 2 | AGGCAATAGAGATTATGCCA | LentiCrisprV2<br>(Addgene #52961) |
| ITGAV Gene 3 | GCCTTAACAATCAATGTCAG | LentiCrisprV2<br>(Addgene #52961) |
| ITGB3 Gene 1 | GCGAGGTGAGCCCAGAGGCA | LentiCrisprV2<br>(Addgene #52961) |
| ITGB3 Gene 2 | TCACAGCGAGGTGAGCCCAG | LentiCrisprV2<br>(Addgene #52961) |
| ITGB3 Gene 3 | TTCTCCTTCAGGTCACAGCG | LentiCrisprV2<br>(Addgene #52961) |
| ITGB5 Gene 1 | TTTTTCCTGCCTAGGACTT  | LentiCrisprV2<br>(Addgene #52961) |
| ITGB5 Gene 2 | ACCGAGAGGTGATGGACCGT | LentiCrisprV2<br>(Addgene #52961) |
| ITGB5 Gene 3 | CACCGAGAGGTGATGGACCG | LentiCrisprV2<br>(Addgene #52961) |
| ITGA6 Gene 1 | CGGATCGAGTTTGATAACGA | LentiCrisprV2<br>(Addgene #52961) |
| ITGA6 Gene 2 | TTTCCAGTTATAAGTACCCG | LentiCrisprV2<br>(Addgene #52961) |
| ITGA6 Gene 3 | GGAGCTCCGTATGATGACTT | LentiCrisprV2<br>(Addgene #52961) |

206
